# Supplementary figures and images for: Promising Role of Alkaloids in the Prevention and Treatment of Thyroid Cancer and Autoimmune Thyroid Disease: A Comprehensive Review of the Current Evidence
Source: MDPI journal article supplement (doi:10.3390/ijms25105395), 2024-05-15

Supplemental Figure S1: Flow chart of the selection of reviewed articles.

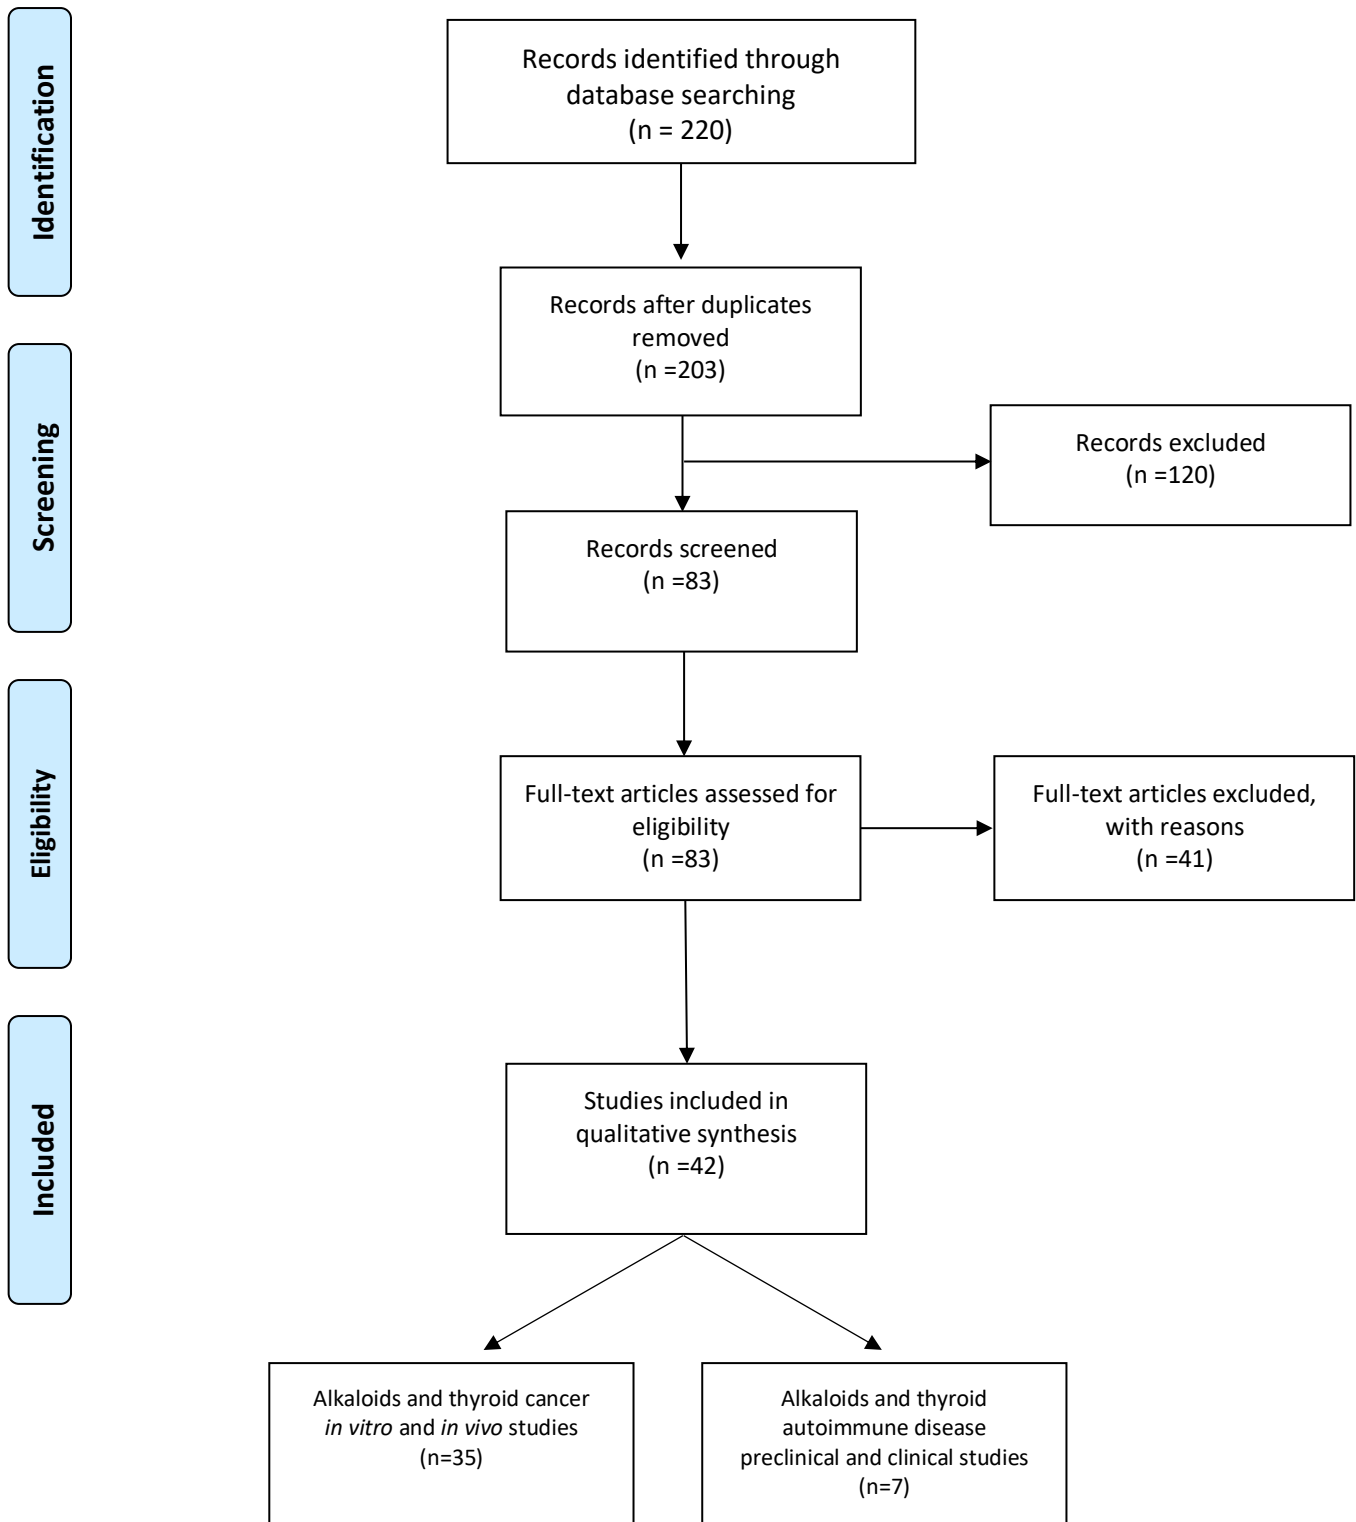

Supplement: s1 [file s1]
